# Supplementary material for: Multi-endpoint assessments for in vitro nano-bio interactions and uptake of biogenic phosphorus nanomaterials using HEK293 cells
Source: Royal Society of Chemistry journal article supplement (doi:10.1039/d2va00318j), 2023-01-01
Supplement: d2va00318j1.pdf [file d2va00318j1.pdf]

## Electronic supplementary information

### Multi-endpoint assessments for *in vitro* nano-bio interactions and uptake of biogenic phosphorus nanomaterials using HEK293 cells

Ayushi Priyam<sup>a,b</sup>, Luis O.B. Afonso<sup>b</sup>, Aaron G. Schultz<sup>b</sup>, Amit Kumar Dinda<sup>c</sup>, Pushplata Prasad Singh<sup>a,b</sup> \*

<sup>a</sup> *National Centre of Excellence for Advanced Research in Agricultural Nanotechnology, TERI - Deakin Nanobiotechnology Centre, Sustainable Agriculture Division, The Energy and Resources Institute (TERI), DS Block, India Habitat Centre, Lodhi Road, New Delhi, 110003, India*

<sup>b</sup> *School of Life and Environmental Sciences, Deakin University, Geelong, Victoria, 3217, Australia.*

<sup>c</sup> *Department of Pathology, All India Institute of Medical Sciences, Ansari Nagar, New Delhi, 110029, India*

Correspondence to [pushplata.singh@teri.res.in](mailto:pushplata.singh@teri.res.in)

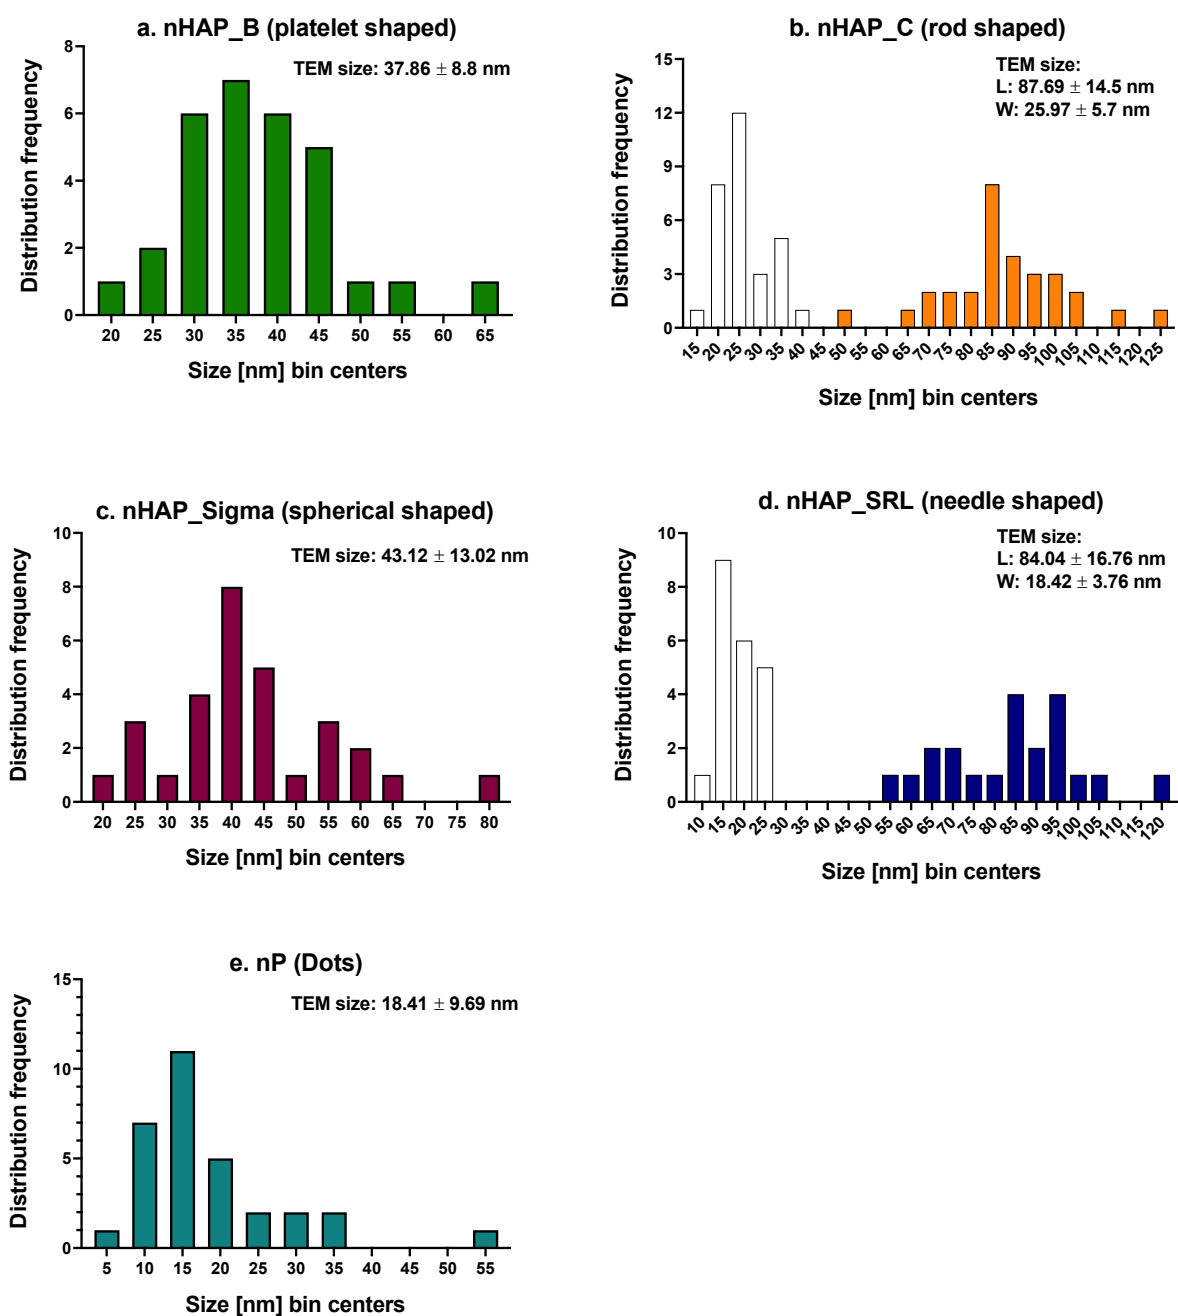

**ESI figure 1.** Histograms (bin centre: 5) showing size distribution as obtained from TEM for a. nHAP\_B, b. nHAP\_C, c. nHAP\_Sigma, d. nHAP\_SRL and e. nP.

**Table 1.** Total number of particles for different concentrations ( $1.5 - 1000 \mu\text{g.mL}^{-1}$ ) of nHAP\_B, nHAP\_C, nHAP\_Sigma, nHAP\_SRL and nP.

| Concentration | Total no. of particles |          |            |          |          |
|---------------|------------------------|----------|------------|----------|----------|
|               | nHAP_B                 | nHAP_C   | nHAP_Sigma | nHAP_SRL | nP       |
| 1.5625        | 2.07E+16               | 1.04E+16 | 2.43E+16   | 4.91E+16 | 7.56E+15 |
| 3.125         | 4.14E+16               | 2.08E+16 | 4.85E+16   | 9.81E+16 | 1.51E+16 |
| 6.25          | 8.28E+16               | 4.17E+16 | 9.71E+16   | 1.96E+17 | 3.03E+16 |
| 12.5          | 1.66E+17               | 8.34E+16 | 1.94E+17   | 3.92E+17 | 6.05E+16 |

|      |          |          |          |          |          |
|------|----------|----------|----------|----------|----------|
| 25   | 3.31E+17 | 1.67E+17 | 3.88E+17 | 7.85E+17 | 1.21E+17 |
| 50   | 6.63E+17 | 3.33E+17 | 7.77E+17 | 1.57E+18 | 2.42E+17 |
| 100  | 1.33E+18 | 6.67E+17 | 1.55E+18 | 3.14E+18 | 4.84E+17 |
| 200  | 2.65E+18 | 1.33E+18 | 3.11E+18 | 6.28E+18 | 9.68E+17 |
| 500  | 6.63E+18 | 3.33E+18 | 7.77E+18 | 1.57E+19 | 2.42E+18 |
| 1000 | 1.33E+19 | 6.67E+18 | 1.55E+19 | 3.14E+19 | 4.84E+18 |

**Table 2.** Number of particles undergoing sedimentation for different concentrations (1.5 – 1000  $\mu\text{g}\cdot\text{mL}^{-1}$ ) of nHAP\_B, nHAP\_C, nHAP\_Sigma, nHAP\_SRL and nP.

| <i>Particles through sedimentation</i> |         |         |            |          |         |
|----------------------------------------|---------|---------|------------|----------|---------|
| <i>Concentration</i>                   | nHAP_B  | nHAP_C  | nHAP_Sigma | nHAP_SRL | nP      |
| 1.5625                                 | 4.7E+09 | 2.3E+09 | 5.5E+09    | 1.1E+10  | 1.7E+09 |
| 3.125                                  | 9.3E+09 | 4.7E+09 | 1.1E+10    | 2.2E+10  | 3.4E+09 |
| 6.25                                   | 1.9E+10 | 9.4E+09 | 2.2E+10    | 4.4E+10  | 6.8E+09 |
| 12.5                                   | 3.7E+10 | 1.9E+10 | 4.4E+10    | 8.8E+10  | 1.4E+10 |
| 25                                     | 7.4E+10 | 3.7E+10 | 8.7E+10    | 1.8E+11  | 2.7E+10 |
| 50                                     | 1.5E+11 | 7.5E+10 | 1.7E+11    | 3.5E+11  | 5.4E+10 |
| 100                                    | 3.0E+11 | 1.5E+11 | 3.5E+11    | 7.1E+11  | 1.1E+11 |
| 200                                    | 6.0E+11 | 3.0E+11 | 7.0E+11    | 1.4E+12  | 2.2E+11 |
| 500                                    | 1.5E+12 | 7.5E+11 | 1.7E+12    | 3.5E+12  | 5.4E+11 |
| 1000                                   | 3.0E+12 | 1.5E+12 | 3.5E+12    | 7.1E+12  | 1.1E+12 |

**Table 3.** Remaining number of particles with colloidal dispersion for different concentrations (1.5 – 1000  $\mu\text{g}\cdot\text{mL}^{-1}$ ) of nHAP\_B, nHAP\_C, nHAP\_Sigma, nHAP\_SRL and nP.

| <i>Remaining no. of particles</i> |          |          |            |          |          |
|-----------------------------------|----------|----------|------------|----------|----------|
| <i>Concentration</i>              | nHAP_B   | nHAP_C   | nHAP_Sigma | nHAP_SRL | nP       |
| 1.5625                            | 2.07E+16 | 1.04E+16 | 2.43E+16   | 4.91E+16 | 7.56E+15 |
| 3.125                             | 4.14E+16 | 2.08E+16 | 4.85E+16   | 9.81E+16 | 1.51E+16 |
| 6.25                              | 8.28E+16 | 4.17E+16 | 9.71E+16   | 1.96E+17 | 3.03E+16 |
| 12.5                              | 1.66E+17 | 8.34E+16 | 1.94E+17   | 3.92E+17 | 6.05E+16 |
| 25                                | 3.31E+17 | 1.67E+17 | 3.88E+17   | 7.85E+17 | 1.21E+17 |
| 50                                | 6.63E+17 | 3.33E+17 | 7.77E+17   | 1.57E+18 | 2.42E+17 |
| 100                               | 1.33E+18 | 6.67E+17 | 1.55E+18   | 3.14E+18 | 4.84E+17 |
| 200                               | 2.65E+18 | 1.33E+18 | 3.11E+18   | 6.28E+18 | 9.68E+17 |
| 500                               | 6.63E+18 | 3.33E+18 | 7.77E+18   | 1.57E+19 | 2.42E+18 |
| 1000                              | 1.33E+19 | 6.67E+18 | 1.55E+19   | 3.14E+19 | 4.84E+18 |

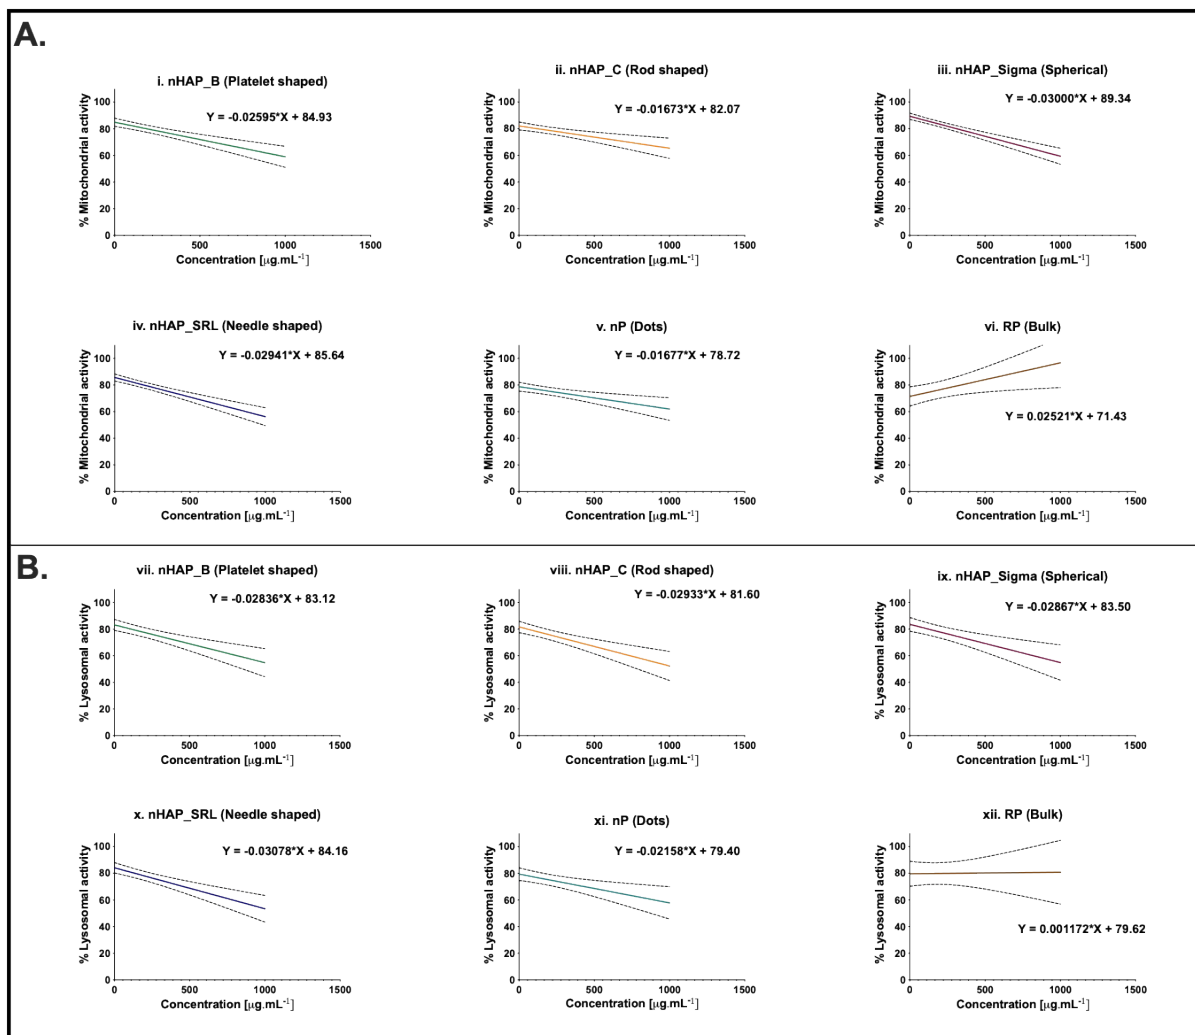

**ESI Figure 2.** Linear regression graph and equations in case of: **A.** MTT assay for mitochondrial activity in case of for (i.) nHAP\_B, (ii.) nHAP\_C, (iii.) nHAP\_Sigma, (iv.) nHAP\_SRL, (v.) nP and (vi.) RP; and **B.** Neutral red assay for lysosomal activity in case of (vii.) nHAP\_B, (viii.) nHAP\_C, (ix.) nHAP\_Sigma, (x.) nHAP\_SRL, (xi.) nP and (xii.) RP.

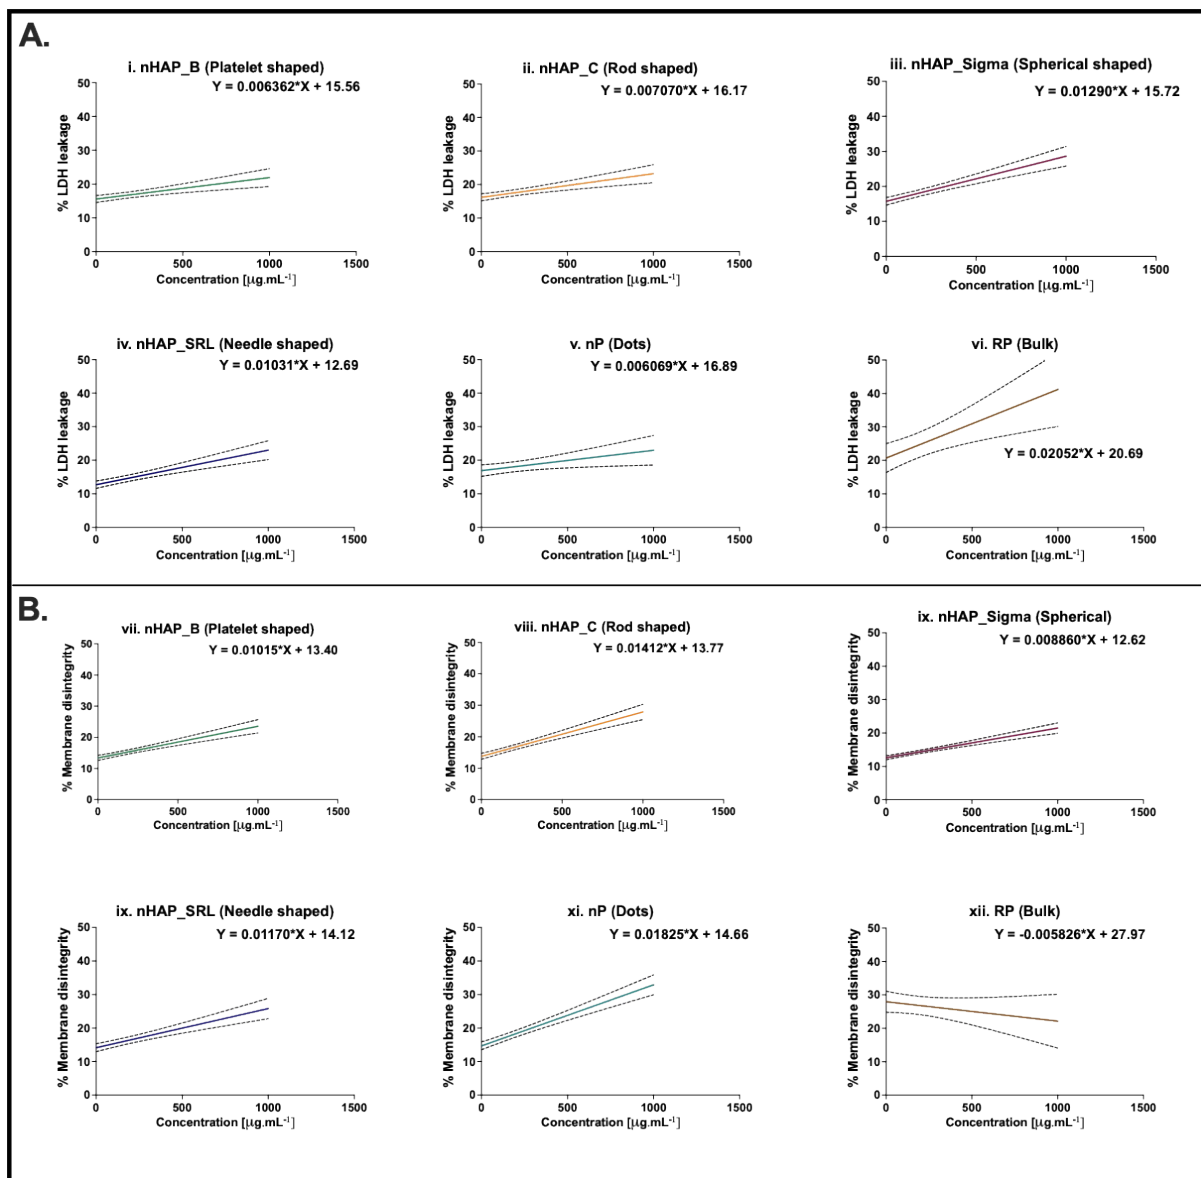

**ESI Figure 3.** Linear regression graph and equations in case of: **A.** Percentage membrane dis-integrity using LDH assay for (i.) nHAP\_B, (ii.) nHAP\_C, (iii.) nHAP\_Sigma, (iv.) nHAP\_SRL, (v.) nP and (vi.) RP; and **B.** Percentage membrane dis-integrity using trypan blue assay for (vii.) nHAP\_B, (viii.) nHAP\_C, (ix.) nHAP\_Sigma, (x.) nHAP\_SRL, (xi.) nP and (xii.) RP.
